# Supplementary material
Source: PubMed Central journal article supplement (PMC3968391)
Supplement: supp_blood-2013-06-510909_Document1.pdf [file supp_blood-2013-06-510909_Document1.pdf]

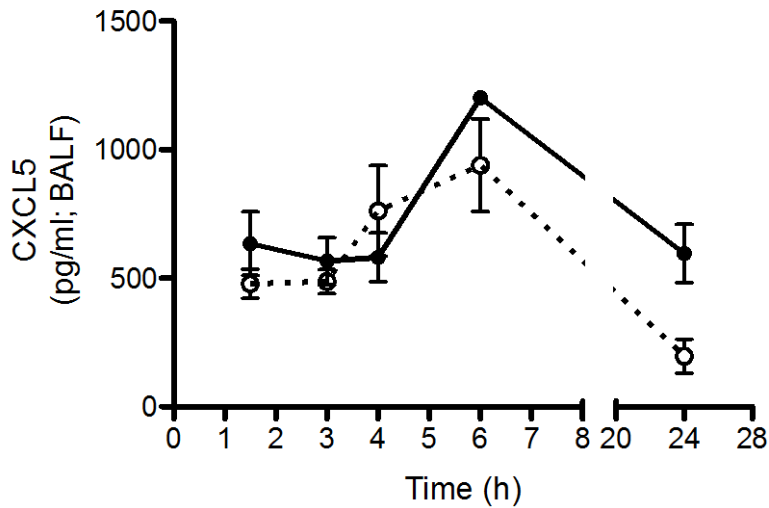

**Supplemental Figure 1. LPS-dependent ATF3 regulation is CXCL1-specific.** Temporal kinetics of airway production of CXCL5 in WT (dotted lines) or ATF3<sup>-/-</sup> (solid lines) mice following i.t. LPS challenge. Representative of 7 experiments, N=3-7 mice/group. BALF, bronchoalveolar lavage fluid.

**A**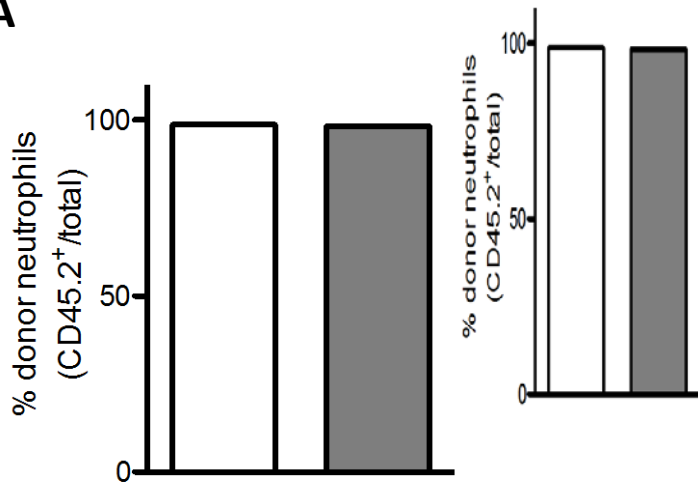**B**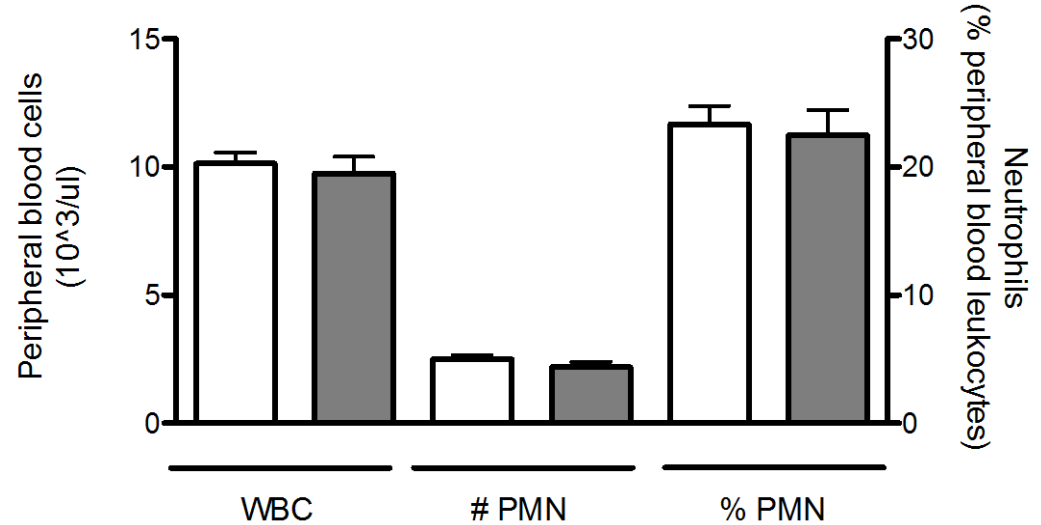

**Supplemental Figure 2. WT- and ATF3<sup>-/-</sup>-reconstituted BM chimeras are equivalent.** Reconstitution efficiency (A) and leukocyte and neutrophil number and percent (B) in peripheral blood are equivalent between CD45.2<sup>+</sup> WT (white bars) and ATF3<sup>-/-</sup> (gray bars) BM-reconstituted CD45.1<sup>+</sup> WT hosts. N=12 ATF3<sup>-/-</sup>, 10 WT, representative of 4 individual experiments. WBC, white blood cells; PMN, neutrophils.

**A**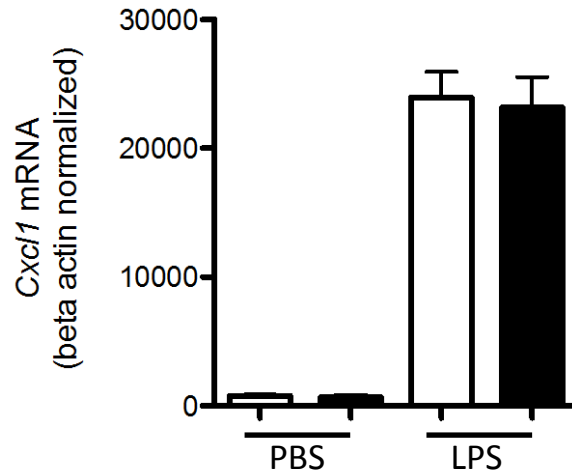**B**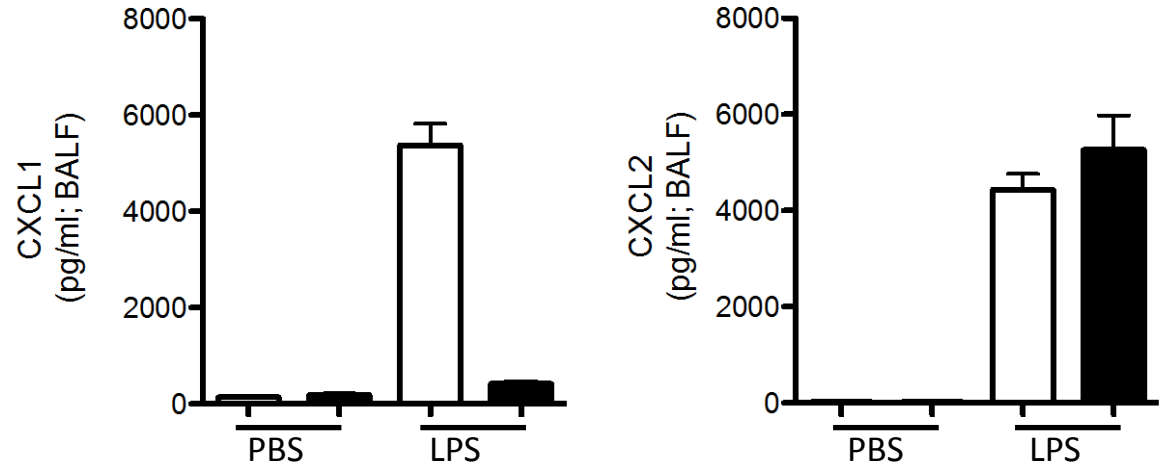

**Supplemental Figure 3. Co-administered anti-CXCL1 antibodies specifically neutralize LPS-dependent CXCL1 production.** (A) WT mice challenged i.t. with PBS or LPS, and isotype control (white bars) or anti-CXCL1 (black bars) antibodies were sacrificed after 4 hours and their lungs harvested into TRIzol after BAL. *Cxcl1* mRNA transcripts were determined as described in methods. (B) BAL from mice challenged in panel A were evaluated for CXCL1 (left) and CXCL2 (right) production by ELISA. Single experiment, N=6 mice/group. Statistics are unpaired, two-tailed *t* test. \*\*\* $p < 0.0001$ . BALF, bronchoalveolar lavage fluid.

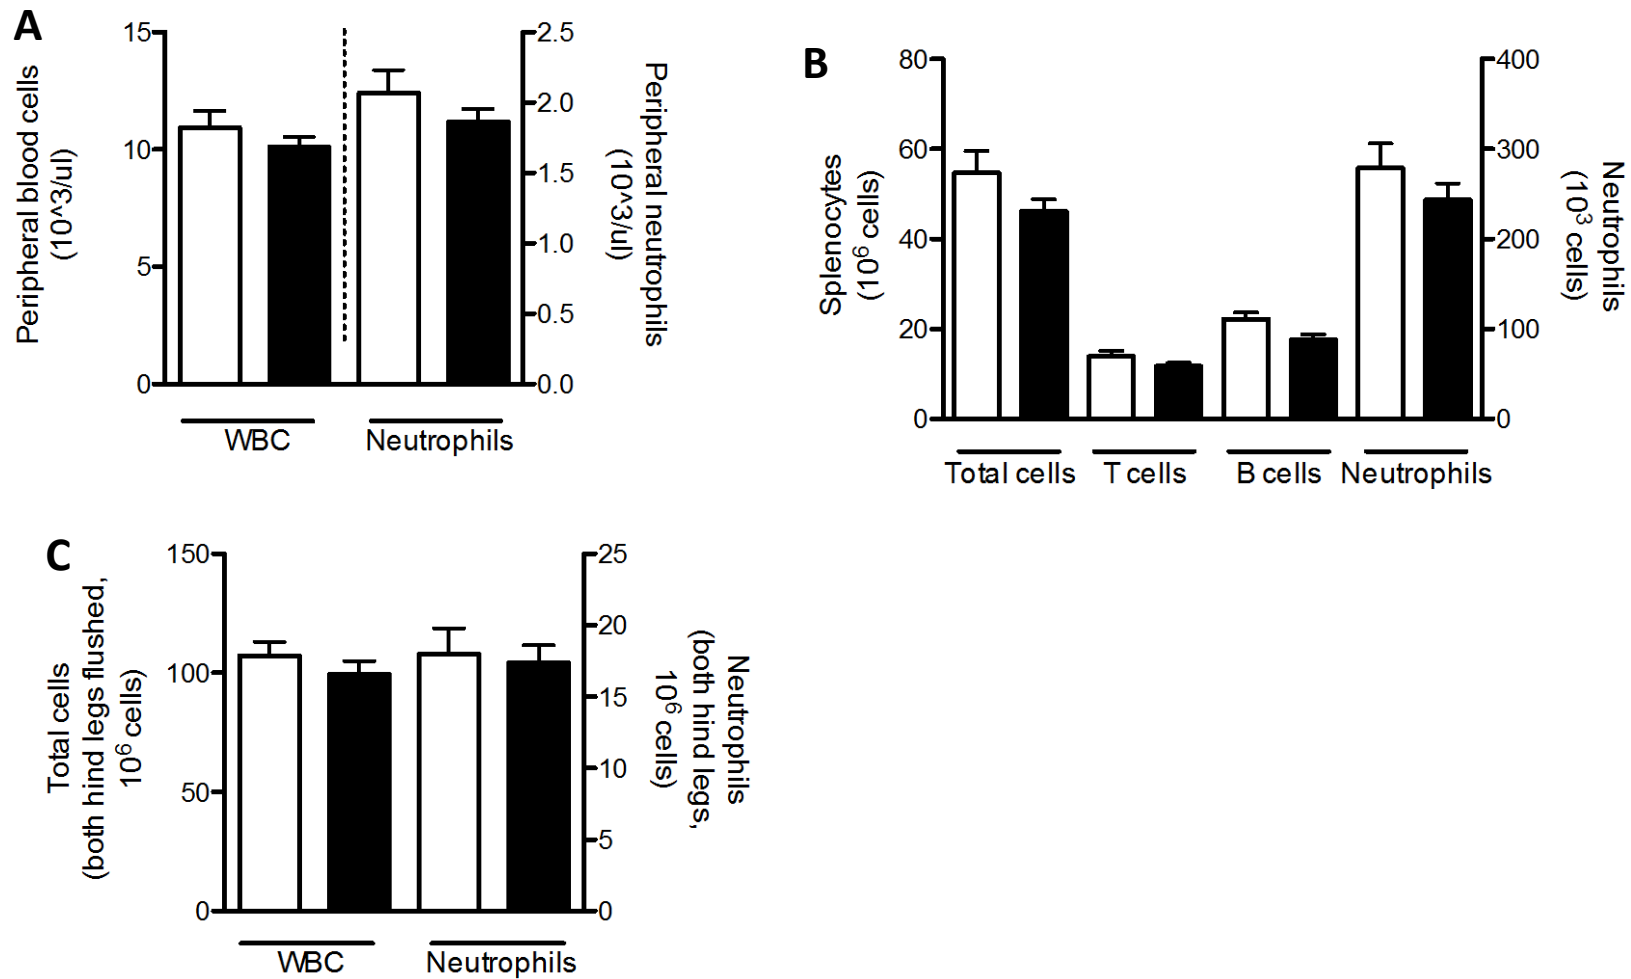

**Supplemental Figure 4. No differences in *ATF3*<sup>-/-</sup> neutrophil distribution.** Neutrophils numbers were assayed by flow cytometry for neutrophil markers 7/4 or Ly6G in peripheral blood (A), spleen (B) or BM (C). Peripheral blood was drawn via tail bleeds into EDTA-chelated tubes. The spleen was harvested, disaggregated through a 100um cell filter and treated with ACK to lyse red blood cells (RBCs). BM was flushed from hind leg bones and disaggregated through a 40um cell filter. Representative of 3 experiments N=8-11 mice/genotype. WBC, white blood cells.

**A**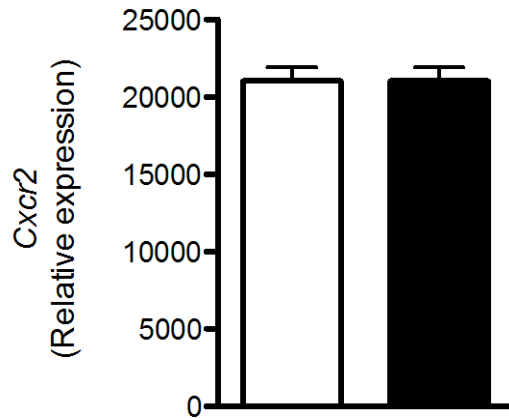**B**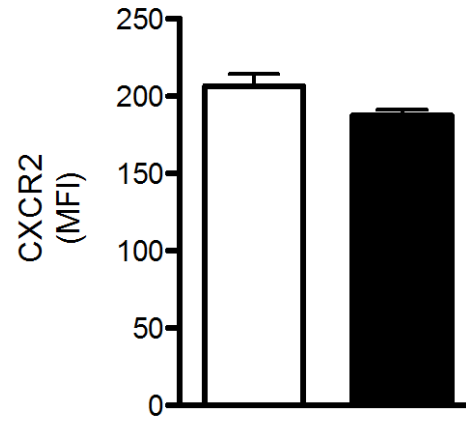

**Supplemental Figure 5. ATF3<sup>-/-</sup> neutrophil show no differences in CXCR2 expression.** CXCR2 expression analyzed at the mRNA level by microarray (A) and flow cytometry-based surface protein expression (B) on WT (white bars) and ATF3<sup>-/-</sup> (black bars) neutrophils. Representative of 1 experiment N=5-6 mice/genotype. MFI, mean fluorescence intensity.

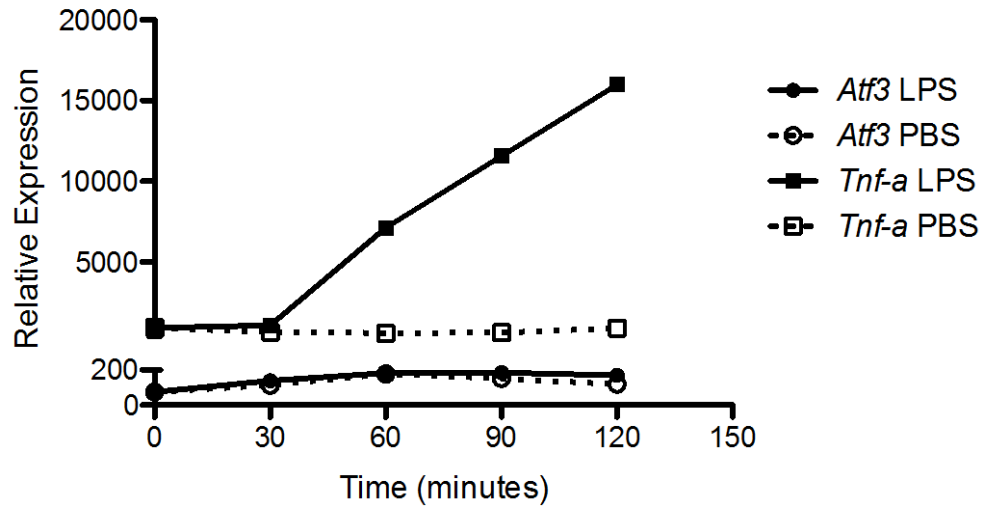

**Supplemental Figure 6. *Atf3* is not expressed in stimulated mouse neutrophils.** WT neutrophils stimulated *in vitro* were analyzed by qRT-PCR for *Atf3* (circles) and *Tnf- $\alpha$*  (squares) in response to 10ng/ml LPS (solid lines) or PBS control (dotted lines). Representative of a single experiment, N=2 wells/condition.

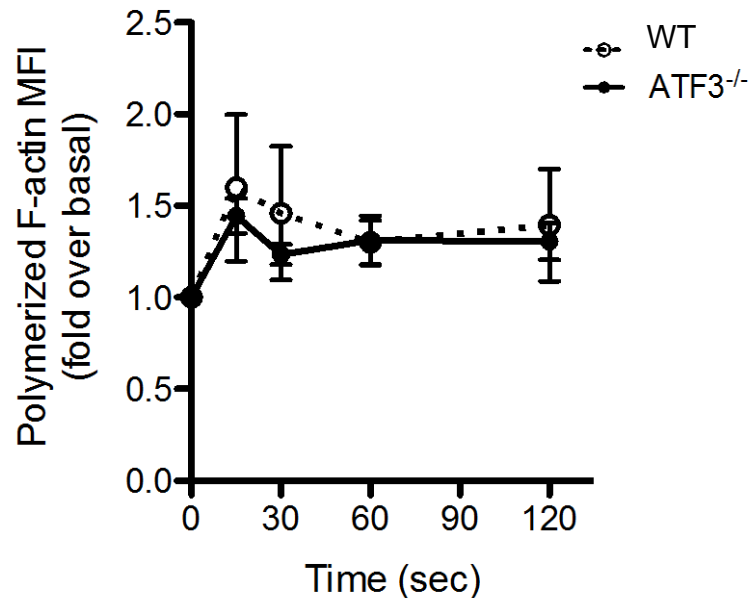

**Supplemental Figure 7. ATF3-mediated differences in F actin polymerization are adhesion-dependent.** Neutrophils were stimulated with fMLP for the indicated times in a 37°C water bath and quenched with 2% PFA. F-actin polymerization was determined by flow cytometry and reported as fold increase in phalloidin-rhodamine MFI over baseline. Results pooled from 3 independent experiments. 1 mouse/genotype/experiment. MFI, mean fluorescence intensity.

**A**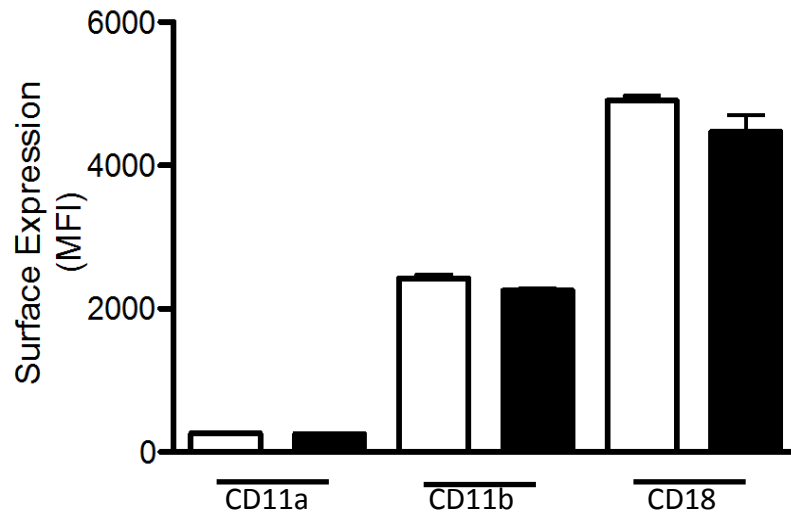**B**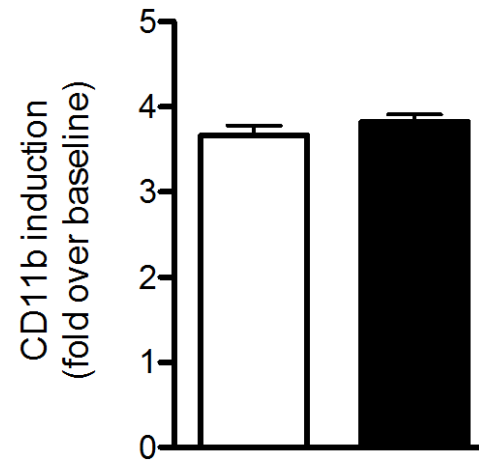

**Supplemental Figure 8. ATF3<sup>-/-</sup> neutrophils display normal  $\beta_2$  integrin expression.**

(A) The major  $\beta_2$  integrins CD11a (LFA-1), CD11b (Mac-1) and the common  $\beta_2$  subunit, CD18, were quantified by flow cytometry on unstimulated neutrophils from WT (white bars) or ATF3<sup>-/-</sup> (black bars) mice. Data are representative of 2 experiments, N=4-6 mice/genotype. (B) WT (white bars) and ATF3<sup>-/-</sup> (black bars) neutrophils were stimulated with fMLP and CD11b surface expression enrichment compared to baseline was measured by flow cytometry. Data are from 1 experiment, N=4-6 mice/genotype. MFI, mean fluorescence intensity.



| Gene ID   | Gene name                                           | Accession # | Fold-change | Corrected <i>p</i> value |
|-----------|-----------------------------------------------------|-------------|-------------|--------------------------|
| Tiam2     | T-cell lymphoma invasion and metastasis 2           | NM_011878   | -284.039    | 0.000                    |
| Erd1      | Erythroid differentiation regulator 1               | NM_133362   | -24.121     | 0.004                    |
| Odz3      | Odd Oz/ten-m homolog 3                              | AK050784    | 5.838       | 0.024                    |
| Igh-VJ558 | Immunoglobulin heavychain (J558 family)             | BC019425    | 5.544       | 0.033                    |
| Igj       | Immunoglobulin joining chain                        | NM_152839   | 3.505       | 0.031                    |
| Efna2     | Ephrin A2                                           | NM_007909   | 2.498       | 0.046                    |
| Sympo     | Synaptopodin                                        | AK020250    | 2.493       | 0.024                    |
| Susd4     | Sushi domain containing 4                           | NM_144796   | 2.433       | 0.020                    |
| Mtus2     | Microtubule associated tumor suppressor candidate 2 | NM_029920   | 2.083       | 0.027                    |

**Supplemental Table 1. Significantly differentially expressed protein encoding genes identified by microarray analysis comparison of WT and ATF3<sup>-/-</sup> neutrophils.** Table represents significantly differentially expressed genes independently co-identified by analysis of microarray data as described in “Methods.” Indicated fold change and corrected *p* values are of ATF3<sup>-/-</sup> neutrophils relative to WT neutrophils from RMA-normalized probes and Benjamini-Hochberg post-test to correct for multiple comparisons.

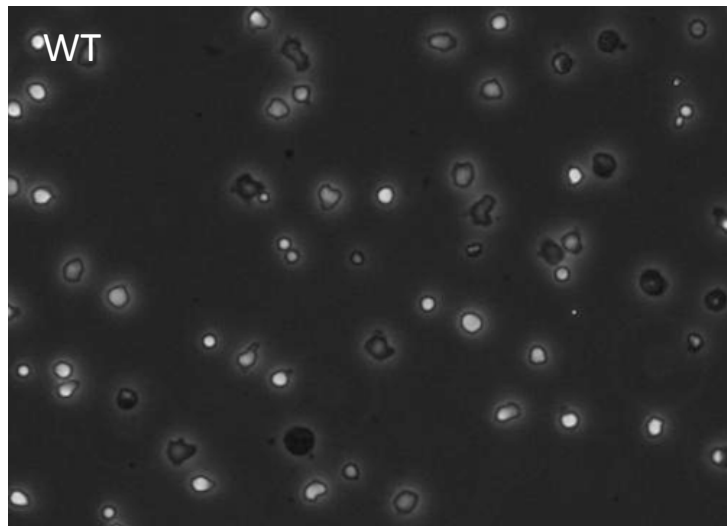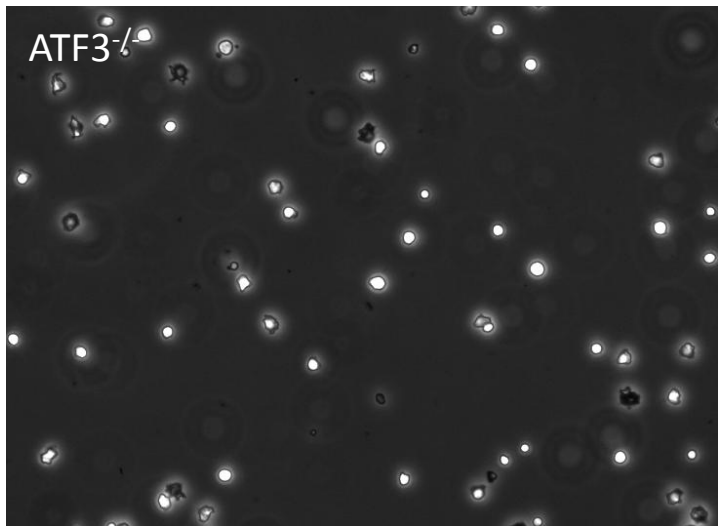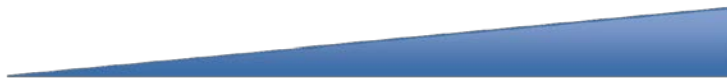

10  $\mu$ M fMLP

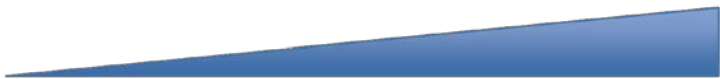

10  $\mu$ M fMLP

**Supplemental videos. ATF3<sup>-/-</sup> neutrophils exhibit defective chemotaxis.** WT (left video) or ATF3<sup>-/-</sup> (right video)  $0.1 \times 10^6$  neutrophils were plated and allowed to adhere to uncoated glass coverslips for 30 minutes at 37°C. Non-adherent cells were washed with 0.1% gelatin in HBSS + 1 mM HEPES and then coverslips were mounted in a Zigmond chamber in a gradient of 10  $\mu$ M fMLP in HBSS + 1 mM HEPES on the right. Images were acquired every 5 seconds for 20 minutes on a Zeiss Axiovert 200 microscope at 10X/0.3 NA objective (original magnification x100), equipped with an ORCA-ER-C4742-95 camera driven by OpenLab software version 5.5.0.
